# Supplementary material for: Lie and Non-Lie Symmetries of Nonlinear Diffusion Equations with Convection Term
Source: Royal Society of Chemistry journal article supplement (doi:10.1039/d2na00605g), 1997-01-01
Supplement: d2na00605g1.pdf [file d2na00605g1.pdf]

## Supporting Information

# Plasmonic photothermal activation of an organosilica shielded cold-adapted lipase co-immobilised with gold nanoparticles

Carolina I. Giunta, Seyed Amirabbas Nazemi, Magdalena Olesińska and Patrick Shahgaldian

### Table of Contents

|                                                                                         |   |
|-----------------------------------------------------------------------------------------|---|
| Supporting Figures .....                                                                | 2 |
| Figure S1. AuNPs characterisation.....                                                  | 2 |
| Figure S2. SP-Au characterisation.....                                                  | 3 |
| Figure S3. SP-CalB characterisation. ....                                               | 3 |
| Figure S4. Stability of <i>p</i> -nitrophenol butyrate (pNPB) and AuNPs catalysis. .... | 4 |
| Figure S5. Immobilisation of AuNPs on the surface of amino-modified SPs.....            | 5 |
| Supporting Tables.....                                                                  | 6 |
| Table S1 .....                                                                          | 6 |
| Table S2.....                                                                           | 7 |
| Table S3.....                                                                           | 8 |

Keywords: gold nanoparticles • silica nanoparticles • enzyme • biocatalysis • surface plasmon resonance

## Supporting Figures

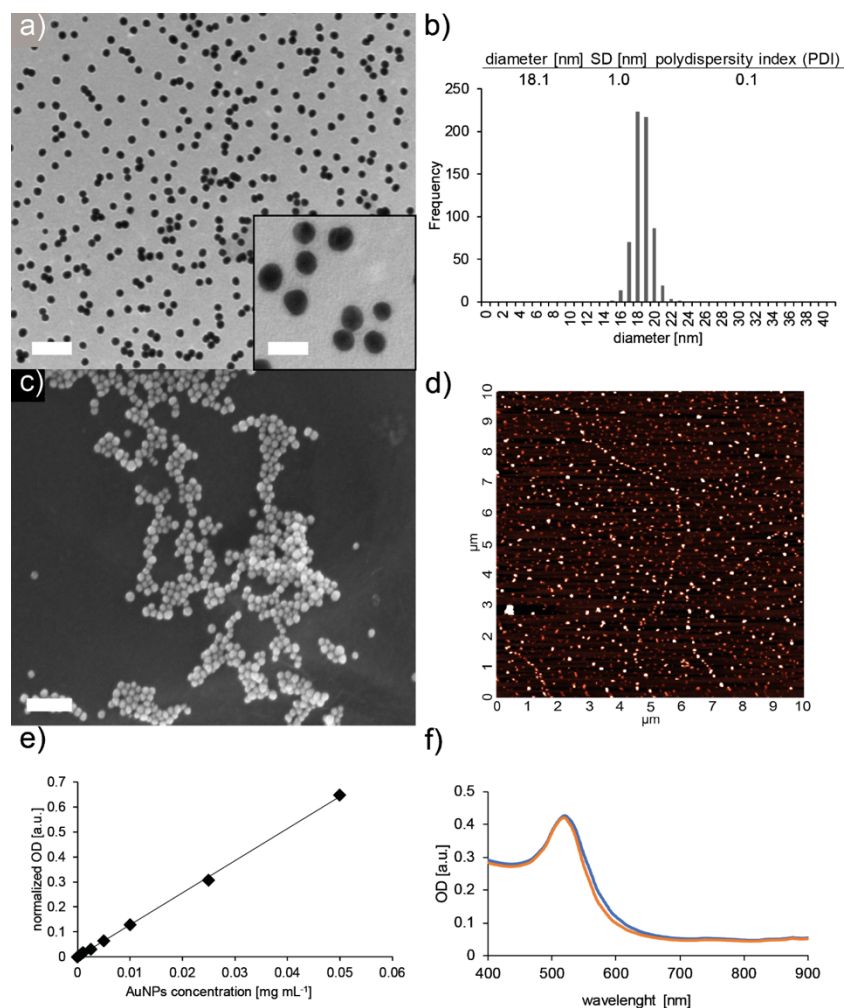

**Fig. S1. AuNP characterisation.** (a) TEM micrographs of the AuNPs produced [scale bars represent 200 nm (main micrograph) and 50 nm (insert)]; (b) AuNP diameter distribution measured on TEM micrographs (measured on 633 AuNPs), polydispersity index (*PDI*) calculated as  $\sigma/\bar{d}$ , where ( $\sigma$ ) is the standard deviation and  $\bar{d}$  the average diameter of the AuNPs; (c) SEM and (d) AFM micrographs (scale bar in (c) represents 200 nm) of AuNPs-citrate. (e) Absorbance standard curve measured at  $\lambda_{520}$ . (f) absorption spectra of AuNPs-citrate solution before (orange line) and after freeze-drying, in presence of sucrose 5% w/v.

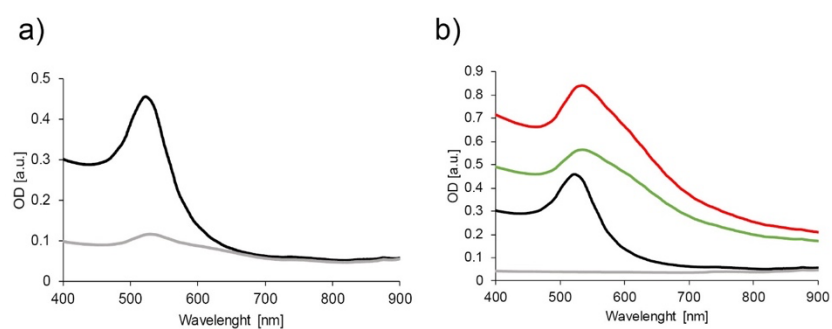

**Fig. S2. SP-Au characterisation.** Absorption spectra of (a) initial AuNPs-citrate ( $0.031 \text{ mg mL}^{-1}$ ) (black line) and of the supernatant after AuNPs immobilisation on SPs (grey line); (b) free AuNPs-citrate (black line), supernatant after glutaraldehyde crosslinking (grey line), SP-Au after glutaraldehyde crosslinking (red line) and SP-Au-CalB (green line).

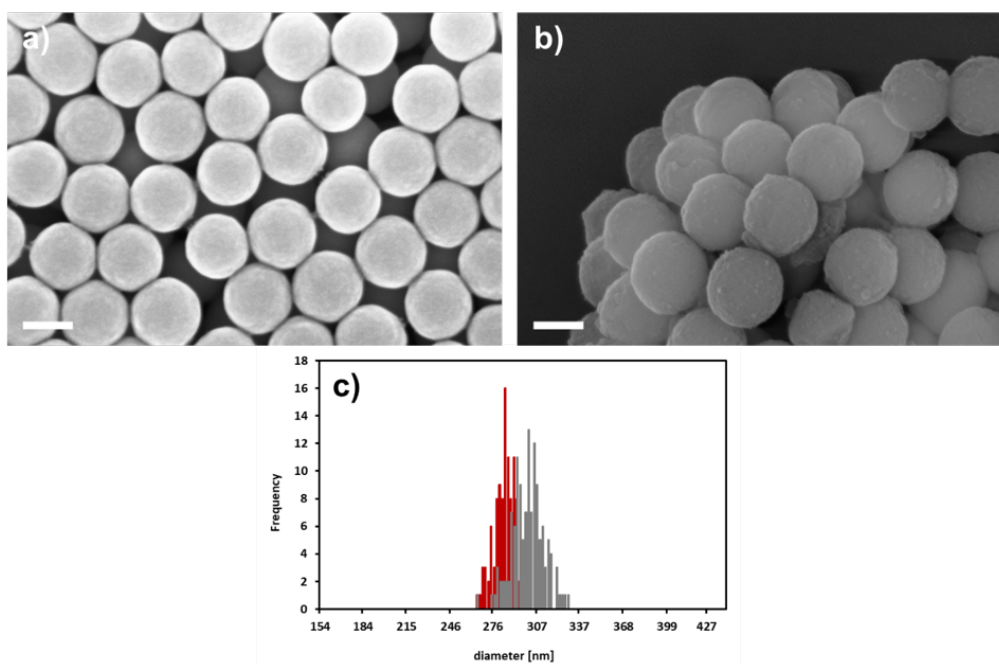

**Figure S3. SP-CalB characterisation.** SEM micrographs of (a) bare SPs and (b) SP-CalB<sub>0s</sub>; (c) diameter distribution of SPs (red bars) and SP-CalB<sub>0s</sub> (grey bars). The average diameter of the shielded particles was calculated to be  $320 \pm 12 \text{ nm}$ , corresponding to a layer thickness of  $18 \pm 4 \text{ nm}$  (bare SPs:  $284 \pm 8 \text{ nm}$ ). Scale bars represent 200 nm.

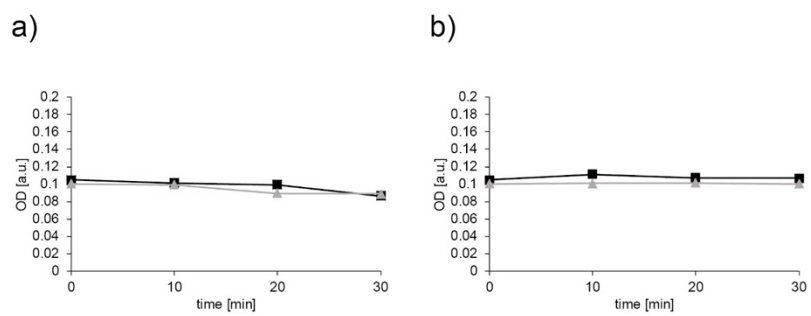

**Figure S4. Stability of *p*-nitrophenol butyrate (pNPB) and AuNPs catalysis.** Absorbance of *p*NPB measured at 410 nm during 30 min at 10 °C in dark condition (black squares) and upon laser irradiation (grey triangles) at 615 mW laser power (a) omitting AuNPs and (b) in presence of AuNPs.

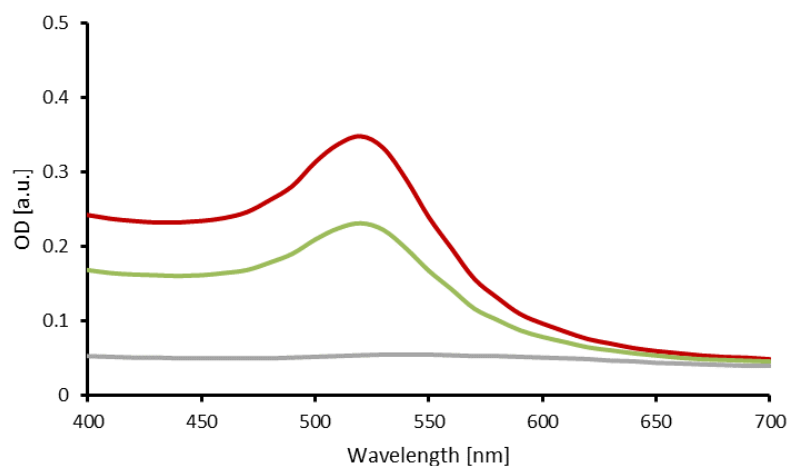

**Figure S5. Immobilisation of AuNPs on the surface of amino-modified SPs.** Absorption spectra of the supernatants (after 10-fold dilution) of gold immobilisation on amino-modified SPs with 1.5 (red line), 3.5 (green line), and 15 (grey line) hours of reaction with APTES. Based on the initial concentration of AuNPs (355  $\mu\text{g}/\text{mL}$ ) and the acquired calibration curve, the amount of AuNPs immobilised is calculated to be 26, 55, and 98  $\mu\text{g}$  of AuNPs per mg of SPs, corresponding to immobilisation yields of 24, 49, and 88% for 1.5, 3.5, and 15 hours of APTES reaction durations, respectively.

## Supporting Tables

**Table S1.**  $\zeta$ -potential values of SPs functionalised with different concentrations of APTES.

| APTES<br>[mM] | $\zeta$ -potential<br>[mV] |
|---------------|----------------------------|
| 0             | -55.0                      |
| 2.6           | - 46.0                     |
| 7.8           | -19.2                      |
| 26            | -9.99                      |

**Table S2.** Protein quantification (BCA assay) carried out on reaction supernatants after immobilisation reaction of CalB.

| OD Supernatant | OD Blank | [CalB] initial ( $\mu\text{g/mL}$ ) | [CalB] supernatant ( $\mu\text{g/mL}$ ) | [CalB] immobilised ( $\mu\text{g/mL}$ ) | Average [CalB] immobilised ( $\mu\text{g/mL}$ ) | Average [CalB] immobilised ( $\mu\text{g/mg SPs}$ ) |
|----------------|----------|-------------------------------------|-----------------------------------------|-----------------------------------------|-------------------------------------------------|-----------------------------------------------------|
| 0.095          | 0.079    | 96                                  | 32                                      | 64                                      |                                                 |                                                     |
| 0.095          | 0.079    | 108                                 | 34                                      | 74                                      | 63                                              | 19.8                                                |
| 0.097          | 0.080    | 86                                  | 34                                      | 52                                      |                                                 |                                                     |

**Table S3.** Measured diameters of AuNPs on TEM micrographs, of bare SPs, SP-CalB<sub>OS</sub> and SP-Au-CalB<sub>OS</sub> on SEM micrographs.

| Sample                   | d (nm) $\pm \sigma$ | Polydispersity index<br>( <i>PDI</i> ) | N. particles measured |
|--------------------------|---------------------|----------------------------------------|-----------------------|
| AuNPs                    | 18.1 $\pm$ 1.0      | 0.060                                  | 633                   |
| Bare SPs                 | 283.7 $\pm$ 7.9     | 0.027                                  | 106                   |
| SP-CalB <sub>OS</sub>    | 319.2 $\pm$ 12.0    | 0.037                                  | 106                   |
| SP-Au-CalB <sub>OS</sub> | 324.5 $\pm$ 13.6    | 0.042                                  | 106                   |
